# Supplementary material
Source: MDPI journal article supplement (https://www.mdpi.com/2073-4344/13/4/662)
Supplement: s1 [file s1]

**Table S1 List of primers used in the study**

| No. | Gene ID   | Description and gene name                                        | Primer (5'-3')                                             |
|-----|-----------|------------------------------------------------------------------|------------------------------------------------------------|
| 1   | AT3G56970 | Basic helix-loop-helix protein 38, AtbHLH38                      | F: ATAGCTTGGGAGTATCTGTTTCGTC<br>R: TAGCCTCTTCACTTGCTGTTGC  |
| 2   | AT2G41240 | Basic helix-loop-helix protein 100, AtbHLH100                    | F: TCTTGTCTTCCTCCCACCAATC<br>R: AACCCCTTCCTCTGACTTACTGTTT  |
| 3   | AT2G18300 | Basic helix-loop-helix protein 64, AtbHLH64                      | F: GATGTGCCATTGTTTCCGTTAG<br>R: TCGATAGATGTCGTTTGGTTCG     |
| 4   | AT2G42380 | Basic-leucine zipper transcription factor family protein, bZIP34 | F: ATCCACGCCGTCCAATAGC<br>R: CCGTACCATCTTCTGGCTCCAT        |
| 5   | AT3G58120 | Basic-leucine zipper transcription factor family protein, bZIP61 | F: CGAAAATCCCAACCATGACG<br>R: CGCTTATAGAACGACGGTGAGTC      |
| 6   | AT5G28770 | Basic-leucine zipper transcription factor family protein, bZIP63 | F: ATCGTTTCATACAAGAATCCTCCG<br>R: CATGGCGACAGCAGCACAA      |
| 7   | AT3G03820 | SAUR-like auxin-responsive protein family, AtSAUR29              | F: GGTGGCTCAGTAGCAGGAACG<br>R: TCCGAACCTCTTCTCAGCTTTGAT    |
| 8   | AT4G34760 | SAUR-like auxin-responsive protein family, AtSAUR50              | F: GACACTTCCCTGTCTATGTCGGAG<br>R: AATTCCTTCCTCGGCTCGTTGTA  |
| 9   | AT1G77760 | Nitrate reductase 1, AtNIA1                                      | F: TCAACGCCGAAGCACCTCT<br>R: AATTCGCTTTGGGAAGTCA           |
| 10  | AT5G65010 | Asparagine synthetase 2, AtASN2                                  | F: TGTCTGGTTTGCTTCGGAGATG<br>R: TCCTTGTTTACTTGAGTAGATGTGGC |
| 11  | AT4G27300 | S-domain-1 (SD1) receptor kinase 1 (SD1-1), AtSD11               | F: TTCCCTTGCGCATCTTCAGC<br>R: GGGATAATCAAACTCTGCCACAAC     |
| 12  | AT3G12580 | Heat shock 70 kDa protein 4, HSP70-4                             | F: CCTTGGGTTTGAAACTGCC<br>R: TTGTTGTCCTTTGTTCGTGCC         |
| 13  | AT1G59860 | 17.6 kDa class I heat shock protein 1, HSP17.6A                  | F: TTCCCGTCATCGTCTTCGTC<br>R: GTCCTGCTTCTCCTCTTTCTCAAC     |
| 14  | AT1G69480 | Phosphate transporter PHO1 homolog 10, PHO1-H10                  | F: AGAACTACGGTACTGAATACATGGC<br>R: AAAACTTCTCGGTCAACCACTC  |
| 15  |           | AtActin                                                          | F: GGTGGTTCCATTCTTGCTTCCC<br>R: TCATACTCGGCCTTGAGATCC      |
